# Supplementary material for: Biotransformation of Indigo Pigment by Indigenously Isolated Pseudomonas sp. HAV-1 and Assessment of Its Antioxidant Property
Source: PubMed Central journal article supplement (PMC4251628; doi:10.1155/2014/109249), 2014-11-17
Supplement: 109249.f1.pdf [file 109249.f1.pdf]

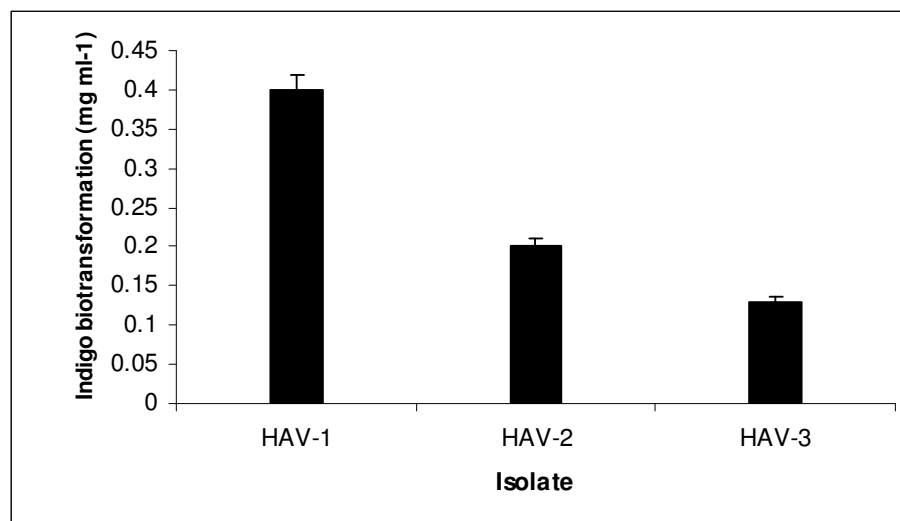

Figure 1: Screening of indigo producing bacterial isolates (HAV-1, HAV-2 and HAV-3) using 3 mM indole concentration at 30°C with initial pH of 7.0

**Table 1: Range of values for the response surface method**

| Independent variables | Levels    |    |     |    |           |
|-----------------------|-----------|----|-----|----|-----------|
|                       | $-\alpha$ | -1 | 0   | +1 | $+\alpha$ |
| Inoculum size (%)     | -2.9      | 5  | 10  | 15 | 17.7      |
| Indole mM             | -0.86     | 1  | 5.5 | 10 | 11.86     |

**Table 2: Experimental design (CCD) in terms of actual and coded value**

| Run | A: Inoculum size (%) |       | B: Indole concentration mM |       |
|-----|----------------------|-------|----------------------------|-------|
|     | Actual               | Coded | Actual                     | Coded |
| 1.  | 5                    | -1    | 1                          | -1    |
| 2.  | 15                   | 1     | 1                          | -1    |
| 3.  | 5                    | -1    | 10                         | 1     |
| 4.  | 15                   | 1     | 10                         | 1     |
| 5.  | 2.92                 | -1.41 | 5.5                        | 0     |
| 6.  | 17.07                | 1.41  | 5.5                        | 0     |
| 7.  | 10                   | 0     | -0.86                      | -1.41 |
| 8.  | 10                   | 0     | 11.8                       | 1.41  |
| 9.  | 10                   | 0     | 5.5                        | 0     |
| 10. | 10                   | 0     | 5.5                        | 0     |
| 11. | 10                   | 0     | 5.5                        | 0     |
| 12. | 10                   | 0     | 5.5                        | 0     |
| 13. | 10                   | 0     | 5.5                        | 0     |
